# Supplementary material
Source: PubMed Central journal article supplement (PMC2835054)
Supplement: mt2008264x5.pdf [file mt2008264x5.pdf]

**Supplementary Table 1. ECG features in different lines of old transgenic mice**

| Transgenic Lines     | <b>27</b>       | <b>29</b>      | <b>32</b>       | <b>951</b>      |
|----------------------|-----------------|----------------|-----------------|-----------------|
| Sample Size (N)      | 5               | 4              | 8               | 6               |
| Age (days)           | 756.20 ± 34.93  | 662.50 ± 16.16 | 631.63 ± 34.64  | 627.67 ± 33.38  |
| Body Weigth (g)      | 30.16 ± 0.93    | 30.58 ± 0.55   | 28.71 ± 1.05    | 29.08 ± 0.58    |
| Heart Rate (bpm)     | 596.96 ± 7.48   | 584.85 ± 6.20  | 606.09 ± 6.71   | 597.75 ± 1.45   |
| PR Interval (msec)   | 48.25 ± 3.18    | 42.65 ± 2.47   | 41.56 ± 0.93    | 41.26 ± 0.82    |
| QRS Duration (msec)  | 8.48 ± 0.30     | 8.29 ± 0.36    | 7.95 ± 0.13     | 7.88 ± 0.17     |
| QT Interval (msec)   | 22.03 ± 0.38    | 21.71 ± 0.92   | 21.36 ± 0.33    | 21.47 ± 0.58    |
| Q Amplitude (mV)     | - 26.25 ± 16.58 | - 4.66 ± 2.23  | - 52.96 ± 18.12 | - 31.50 ± 18.76 |
| Cardiomyopathy Index | 0.64 ± 0.05     | 0.72 ± 0.04    | 0.75 ± 0.02     | 0.73 ± 0.03     |
