# Supplementary material
Source: PubMed Central journal article supplement (PMC2835054)
Supplement: mt2008264x6.pdf [file mt2008264x6.pdf]

**Supplementary Table 2. Hemodynamic profiles in different lines of old transgenic mice**

| Transgenic Lines          | 27                           | 29             | 32             | 951            |
|---------------------------|------------------------------|----------------|----------------|----------------|
| Sample Size (N)           | 4                            | 8              | 6              | 7              |
| Age (days)                | 784.00 ± 34.49 <sup>a</sup>  | 602.50 ± 35.96 | 661.00 ± 42.42 | 636.71 ± 27.43 |
| End-systolic Volume (μl)  | 8.05 ± 1.22                  | 8.20 ± 1.17    | 6.24 ± 0.86    | 6.05 ± 1.46    |
| Maximal Pressure (mmHg)   | 86.88 ± 17.22                | 104.37 ± 1.78  | 105.93 ± 3.11  | 86.33 ± 5.57   |
| dP/dt Maximal (KmmHg/sec) | 8.98 ± 2.27                  | 12.80 ± 0.60   | 12.39 ± 0.53   | 11.98 ± 1.54   |
| End-diastolic Volume (μl) | 20.17 ± 2.61 <sup>a</sup>    | 28.86 ± 1.71   | 23.99 ± 2.13   | 26.81 ± 1.29   |
| Tau (msec)                | 7.76 ± 0.57                  | 7.08 ± 0.83    | 9.64 ± 1.11    | 7.15 ± 0.74    |
| dP/dt Minimal (KmmHg/sec) | - 7.82 ± 1.90                | - 10.21 ± 0.44 | - 9.40 ± 0.38  | - 9.29 ± 0.99  |
| Stroke Volume (μl)        | 15.65 ± 2.28 <sup>a, b</sup> | 23.43 ± 1.13   | 20.86 ± 1.43   | 24.12 ± 1.19   |
| Ejection Fraction (%)     | 68.50 ± 4.07                 | 77.39 ± 2.80   | 78.12 ± 2.63   | 81.20 ± 3.47   |
| Cardiac Output (ml/min)   | 9.26 ± 1.30 <sup>a, b</sup>  | 13.85 ± 0.76   | 12.94 ± 1.00   | 15.12 ± 0.93   |

<sup>a</sup> Significantly different from that of line 29.

<sup>b</sup> Significantly different from that of line 951.
