# Supplementary material
Source: PubMed Central journal article supplement (PMC2835054)
Supplement: mt2008264x7.pdf [file mt2008264x7.pdf]

**Supplementary Table 3. Antibodies used in the study**

| Name     | Regions recognized | Species Specificity   | Dystrophin Specificity               |
|----------|--------------------|-----------------------|--------------------------------------|
| Dys-2    | C-terminal domain  | Both human and mouse  | Both full-length and mini-dystrophin |
| Dys-3    | Hinge 1            | Human dystrophin only | Mini-dystrophin only                 |
| Mandys-8 | Repeat 11          | Both human and mouse  | Full-length dystrophin               |
