# Supplementary material
Source: PubMed Central journal article supplement (PMC2835054)

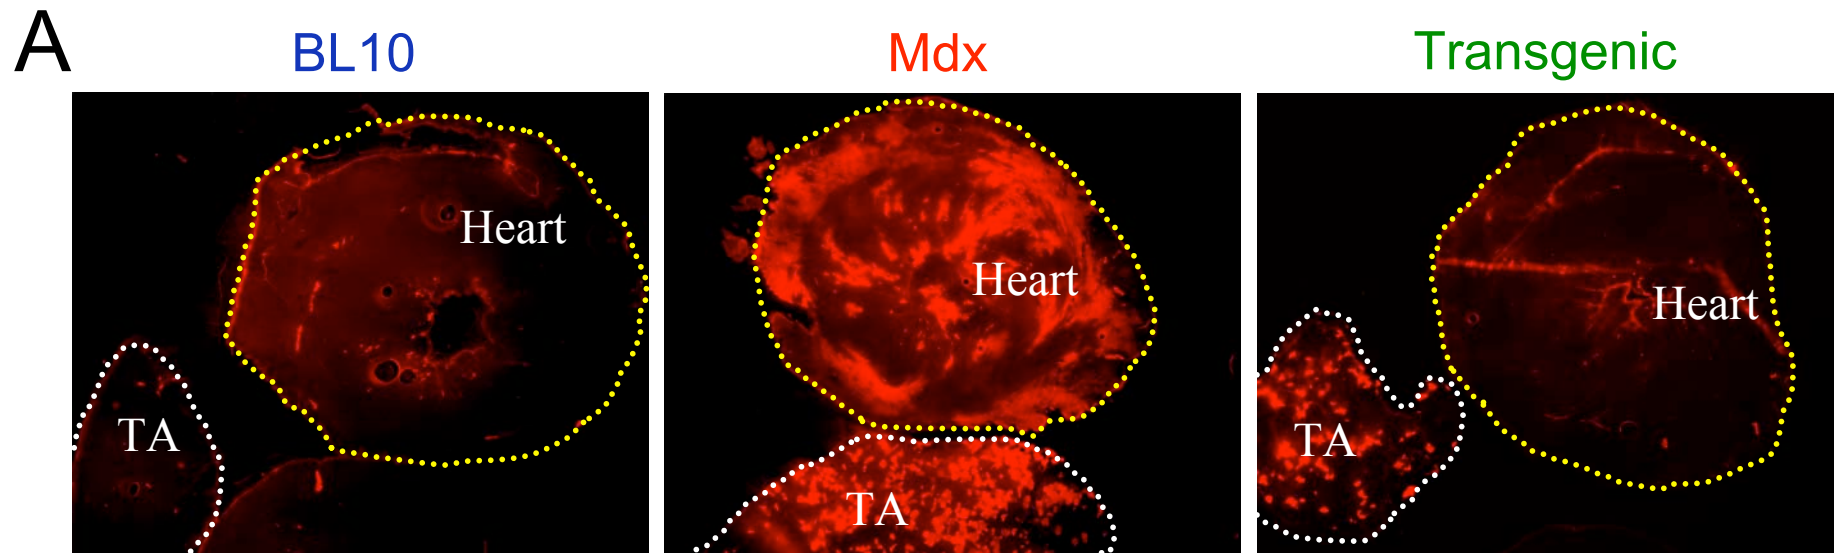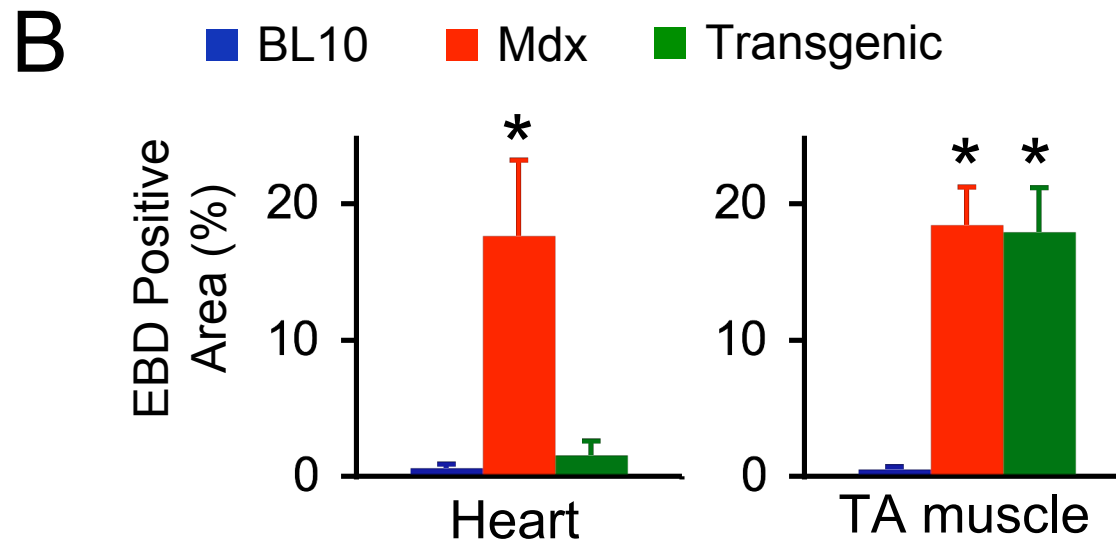

Supplement: mt2008264x3.pdf [file mt2008264x3.pdf]
